# Supplementary material for: Structure of Vibrio collagenase VhaC provides insight into the mechanism of bacterial collagenolysis
Source: PubMed Central journal article supplement (PMC8799719; doi:10.1038/s41467-022-28264-1), 2022-01-28
Supplement: 41467_2022_28264_MOESM1_ESM.pdf [file 41467_2022_28264_MOESM1_ESM.pdf]

**Structure of *Vibrio* collagenase VhaC provides insight into the  
mechanism of bacterial collagenolysis**

**Wang et al**

## Supplementary figures

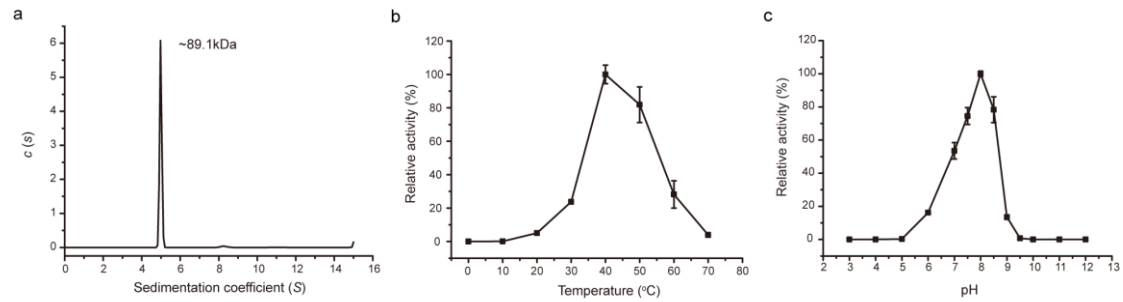

### Supplementary Figure 1 | Characterization of VhaC using type I collagen as

**substrate.** a, Sedimentation-velocity analytical ultracentrifugation (AUC) analysis of the form of VhaC in solution. The peak sedimentation coefficient and the calculated molecular weight for the VhaC protein are shown. b, Effect of temperature on VhaC activity. The specific activity of VhaC at 40°C was taken as 100%. c, Effect of pH on VhaC activity. The specific activity of VhaC at pH 8.0 was taken as 100%. Data shown in figures b and c are means  $\pm$  standard deviations (SD) (n = 3 independent experiments). Source data are provided as a Source Data file.

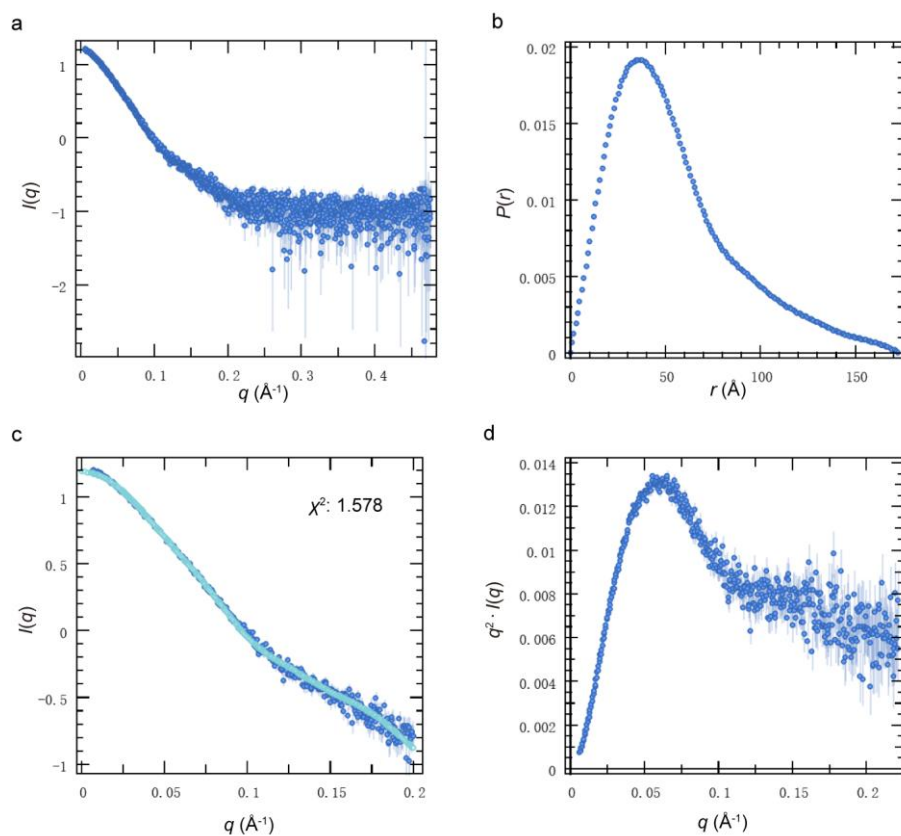

**Supplementary Figure 2 | SAXS data of VhaC.** a, Experimental scattering profile for VhaC. b, The  $P(r)$  distribution for VhaC. c, Fitting of the theoretical scattering curve from the rigid body model and the experimental curve of VhaC. d, The Kratky plot for VhaC. The figures were generated using PRIMUS in the ATSAS 3.0.3 software package. Source data are provided as a Source Data file.

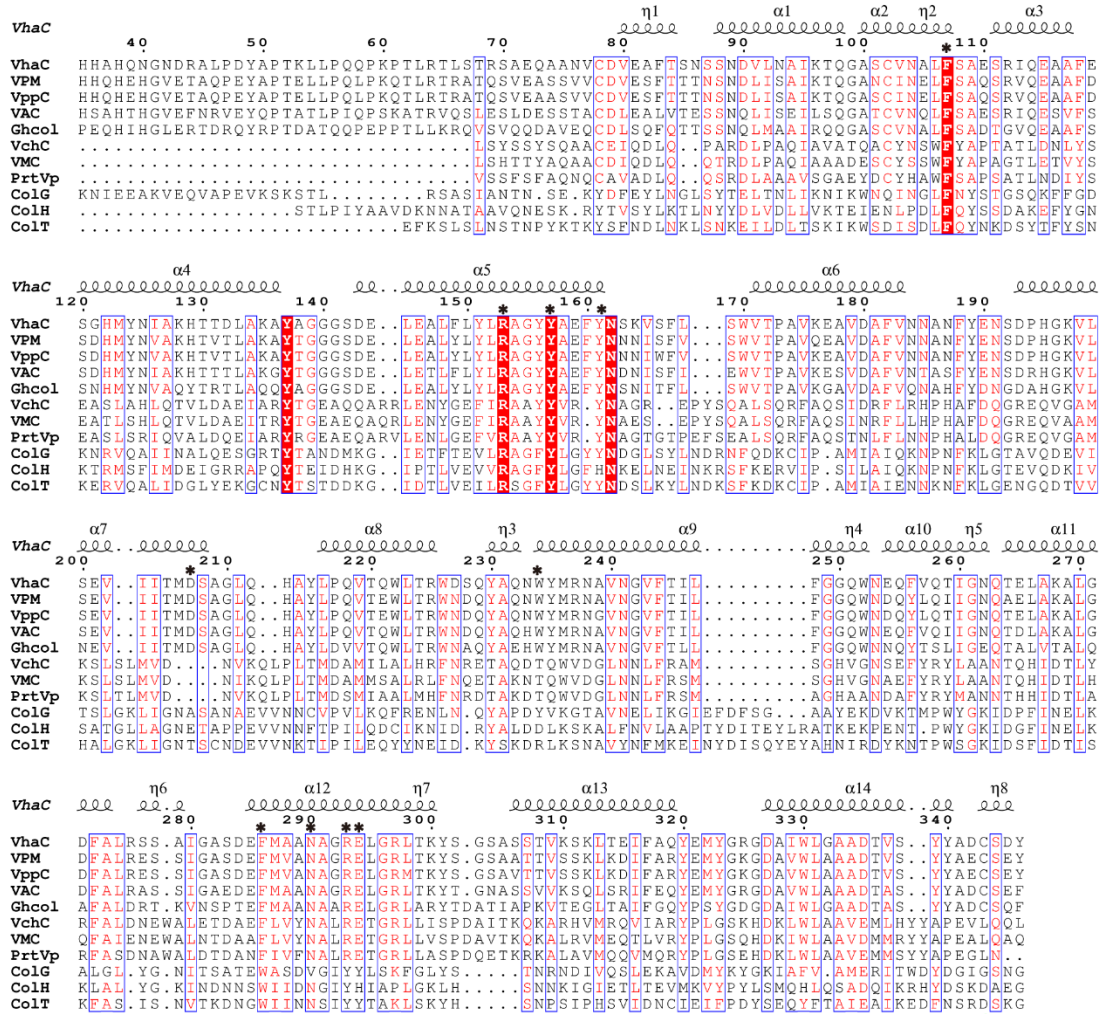

**Supplementary Figure 3 | Multiple sequence alignment of the activator domains of the characterized M9 metalloproteases.** Metalloproteases VhaC (GenBank accession no. WP\_047516938.1), VPM (ABF19104.1), VppC (AAG59883.1), VAC (CAA44501.1), Ghcol (BAK39964.1), VchC (AAF94801.1) VMC (AAC23708.1), and PrtVp (CAA86734.1) are from the M9A subfamily, while ColG (D87215.1), ColH (D29981.1), and ColT (WP\_011100838.1) are from the M9B subfamily. Secondary structures and amino acid numbering for VhaC are shown above the alignment. Amino acid residues indicated with “\*” are those chosen for site-directed mutations to determine the key residues for collagen binding in the activator domain of VhaC.

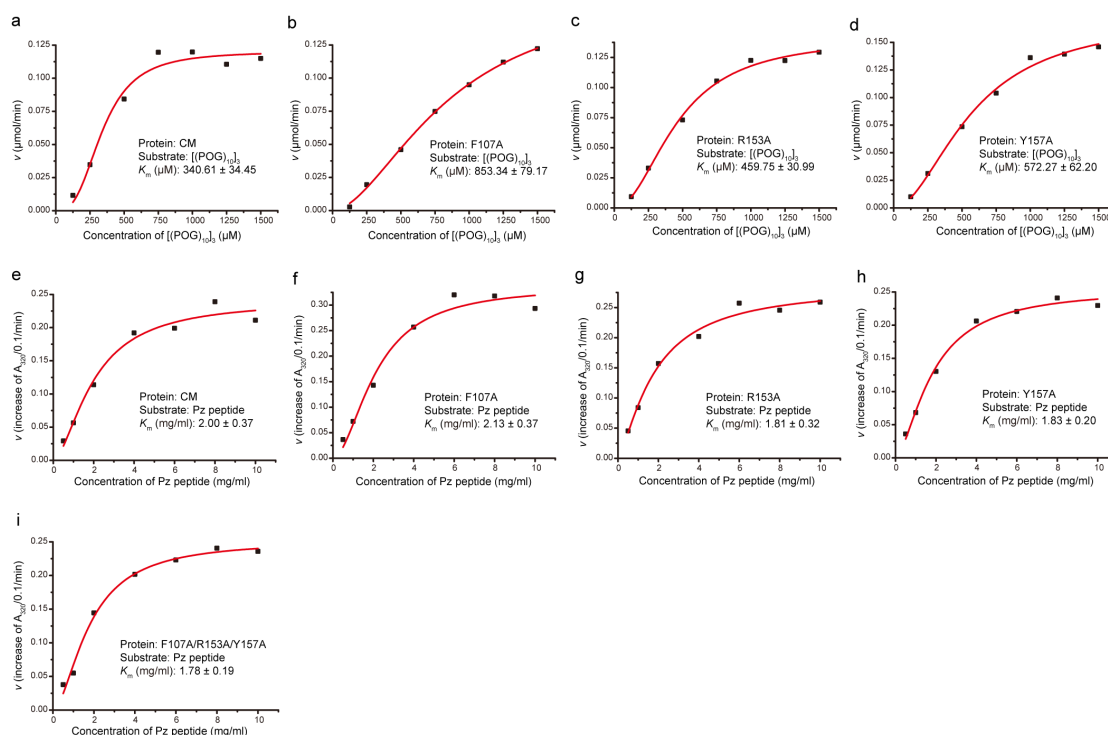

**Supplementary Figure 4 | Non-linear fit curves for the hydrolysis of [(POG)<sub>10</sub>]<sub>3</sub> and Pz peptide by CM and its mutants.** These assays were performed in 50 mM Tris-HCl (pH 8.0) at 25°C for [(POG)<sub>10</sub>]<sub>3</sub> and 40°C for Pz peptide. The K<sub>m</sub> values were calculated by non-linear regression fit directly to the Michaelis-Menten equation using the OriginPro 8.5 software. a, Non-linear fit curve for the hydrolysis of [(POG)<sub>10</sub>]<sub>3</sub> by CM. b, Non-linear fit curve for the hydrolysis of [(POG)<sub>10</sub>]<sub>3</sub> by mutant F107A. c, Non-linear fit curve for the hydrolysis of [(POG)<sub>10</sub>]<sub>3</sub> by mutant R153A. d, Non-linear fit curve for the hydrolysis of [(POG)<sub>10</sub>]<sub>3</sub> by mutant Y157A. e, Non-linear fit curve for the hydrolysis of Pz peptide by CM. f, Non-linear fit curve for the hydrolysis of Pz peptide by mutant F107A. g, Non-linear fit curve for the hydrolysis of Pz peptide by mutant R153A. h, Non-linear fit curve for the hydrolysis of Pz peptide by mutant Y157A. i, Non-linear fit curve for the hydrolysis of Pz peptide by mutant F107A/R153A/Y157A. All data shown are means ± SD (n = 3 independent

experiments). Source data are provided as a Source Data file.

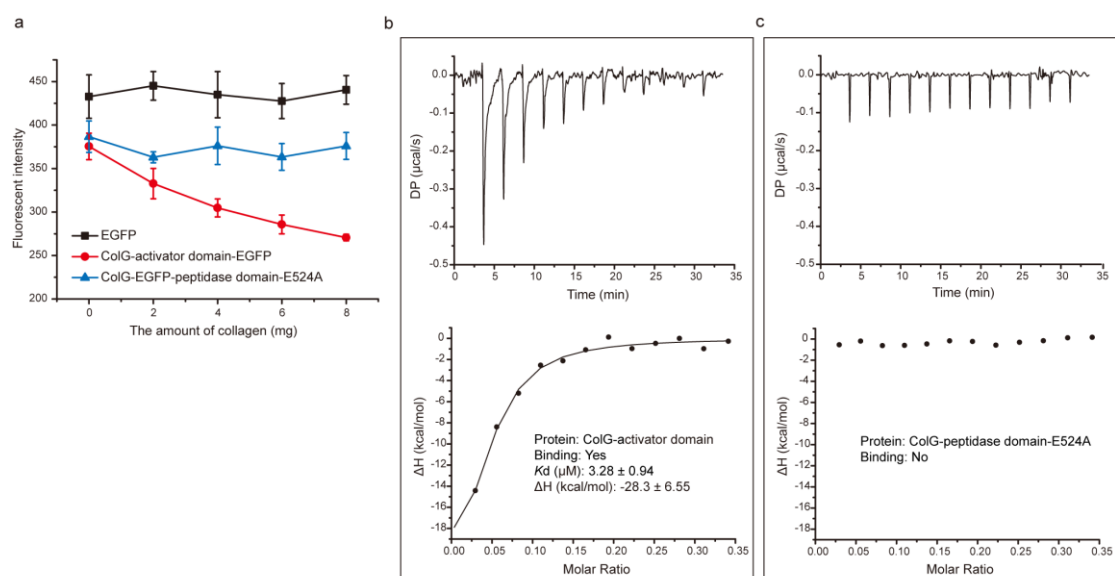

**Supplementary Figure 5 | Analysis of the ability of the activator domain and the peptidase domain of ColG to bind collagen fibers and [(POG)<sub>10</sub>]<sub>3</sub>.** a, Fluorescence analysis of the collagen fiber-binding ability of EGFP, ColG-activator domain-EGFP, and ColG-EGFP-peptidase domain-E524A. Data shown are mean  $\pm$  SD ( $n = 3$  independent experiments). b, ITC analysis of the [(POG)<sub>10</sub>]<sub>3</sub>-binding ability of ColG-activator domain. c, ITC analysis of the ability of ColG-peptidase domain-E524A to bind [(POG)<sub>10</sub>]<sub>3</sub>. Data representative of the results of triplicate experiments are shown. Source data are provided as a Source Data file.

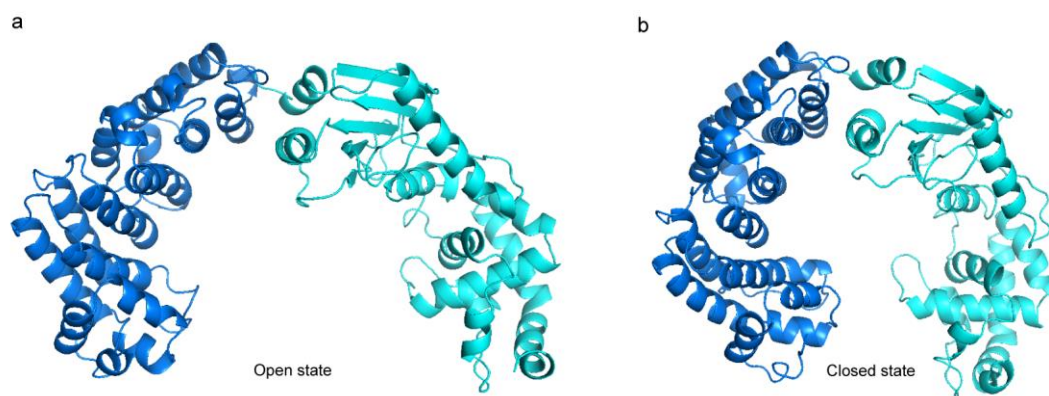

**Supplementary Figure 6 | Cluster analysis of the open and close states of unbound-CM.** The enzyme conformations obtained by cluster analysis show the open (a) and closed (b) states of unbound-CM.

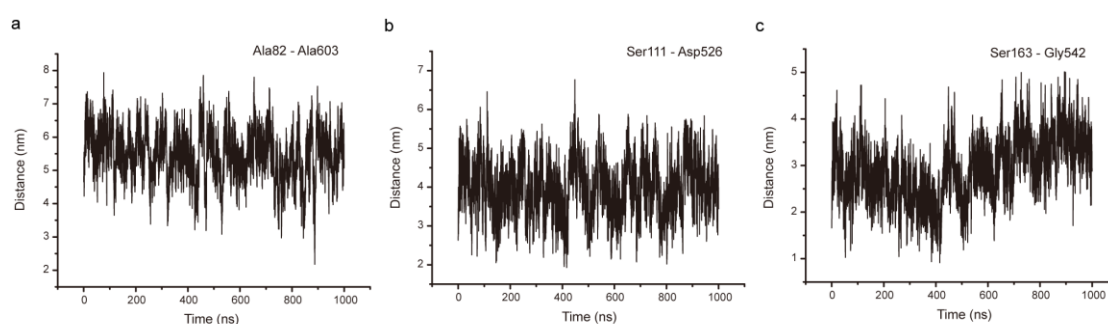

**Supplementary Figure 7 | The distances between the  $C\alpha$  atoms of several pairs of terminal residues in the activator and the peptidase domains over the molecular dynamics trajectory.** a, The distance between the  $C\alpha$  atoms of residues Ala82 and Ala603. b, The distance between the  $C\alpha$  atoms of residues Ser111 and Asp526. c, The distance between the  $C\alpha$  atoms of residues Ser163 and Gly542.

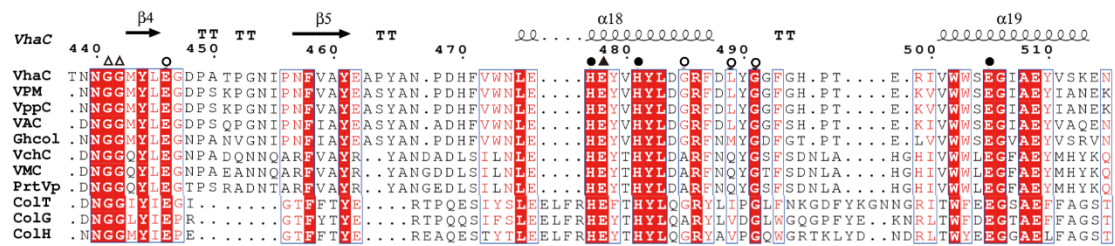

**Supplementary Figure 8 | Sequence alignment of the catalytic centers of the characterized M9 metalloproteases.** Metalloproteases VhaC (WP\_047516938.1), VPM (ABF19104.1), VppC (AAG59883.1), VAC (CAA44501.1), Ghco1 (BAK39964.1), VchC (AAF94801.1) VMC (AAC23708.1), and PrtVp (CAA86734.1) are from the M9A subfamily, while CoIT (WP\_011100838.1), CoIG (D87215.1), and CoIH (D29981.1) are from the M9B subfamily. Secondary structures and amino acid numbering for VhaC are shown above the alignment. Solid circles indicate residues involved in Zn<sup>2+</sup> binding, open circles indicate residues involved in Ca<sup>2+</sup> binding, the double Gly-motif is marked by open triangles and the catalytic residue Glu478 is marked by a solid triangle.

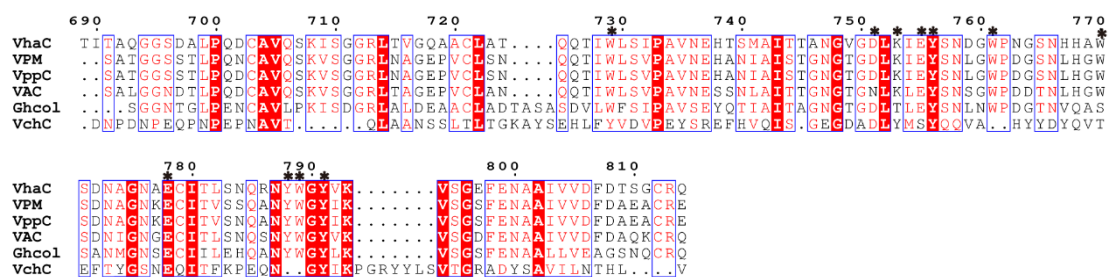

**Supplementary Figure 9 | Sequence alignment of the PPC domains of the characterized M9A metalloproteases.** The amino acid sequences are from VhaC (WP\_047516938.1), VPM (ABF19104.1), VppC (AAG59883.1), VAC (CAA44501.1), Ghco1 (BAK39964.1), and VchC (AAF94801.1). The amino acid numbering of VhaC is shown above the alignment. Amino acid residues indicated





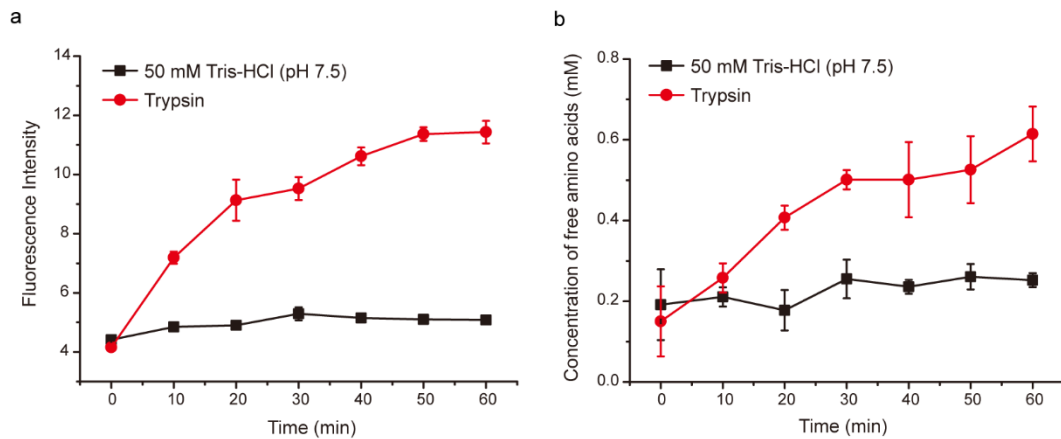

**Supplementary Figure 11 | Analysis of pyridinolines (a) and amino acids (b)**

**released from collagen fibers by trypsin.** Collagen fibers (30 mg) were incubated with 50 mM Tris-HCl (pH 7.5) or 0.5  $\mu$ M trypsin at 37°C for 1 h with continuous stirring. Content of pyridinolines in the supernatant of the digested mixture was detected on a FP-6500 spectrofluorometer (Jasco, Japan) at an excitation wavelength of 325 nm and an emission wavelength of 400 nm. Concentrations of amino acids in the supernatant of the digested mixture were detected at the indicated digestion times by the colorimetric ninhydrin method with L-leucine as the standard. All data shown are means  $\pm$  SD (n = 3 independent experiments). Source data are provided as a Source Data file.

## Supplementary tables

**Supplementary Table 1 | Substrate specificity of VhaC.**

| <b>Substrate</b>                            | <b>Activity<sup>a</sup> (U/mg)</b> |
|---------------------------------------------|------------------------------------|
| Fish collagen fibers                        | 1281.69 ± 70.12                    |
| Type I collagen from bovine achilles tendon | 281.07 ± 15.13                     |
| Type II collagen from bovine nasal septum   | 378.66 ± 37.06                     |
| Type III collagen from human placenta       | 374.04 ± 51.31                     |
| Type IV collagen from human placenta        | 252.95 ± 29.34                     |
| Type V collagen from human placenta         | 32.45 ± 4.31                       |
| Gelatin                                     | 86.59 ± 3.82                       |
| Casein                                      | ND <sup>b</sup>                    |

<sup>a</sup>The specific activity of VhaC toward each substrate was measured in 50 mM Tris-HCl (pH 8.0). All data shown are means ± SD (n = 3 independent experiments).

Source data are provided as a Source Data file.

<sup>b</sup>ND means that the enzyme activity was not detectable.

**Supplementary Table 2 | Diffraction data and refinement statistics of CM and SeMet-CM.**

| <b>Parameters</b> | <b>CM</b>               | <b>SeMet-CM</b>         |
|-------------------|-------------------------|-------------------------|
| Data collection   |                         |                         |
| Space group       | <i>P</i> 2 <sub>1</sub> | <i>P</i> 2 <sub>1</sub> |

|                                    |                        |                        |
|------------------------------------|------------------------|------------------------|
| Wavelength (Å)                     | 0.9792                 | 0.9792                 |
| Unit cell parameters               | a=74.444 Å             | a=74.139 Å             |
|                                    | b=50.068 Å             | b=49.833 Å             |
|                                    | c=90.681 Å             | c= 91.447 Å            |
|                                    | $\alpha=90^\circ$      | $\alpha=90^\circ$      |
|                                    | $\beta=104.72^\circ$   | $\beta=104.879^\circ$  |
|                                    | $\gamma=90^\circ$      | $\gamma=90^\circ$      |
| Resolution range (Å)               | 42.56-1.80 (1.87-1.80) | 40.91-1.80 (1.86-1.80) |
| Unique reflections                 | 59569 (5891)           | 60212 (5972)           |
| Redundancy                         | 3.4 (3.5)              | 6.7 (6.3)              |
| Completeness (%)                   | 99.1 (99.8)            | 99.96 (99.97)          |
| $R_{\text{meas}}$                  | 0.061 (0.164)          | 0.101 (0.543)          |
| $R_{\text{p.i.m}}$                 | 0.033 (0.087)          | 0.039 (0.215)          |
| Mean $I/\sigma(I)$                 | 23.95 (8.87)           | 29.50 (3.00)           |
| Refinement statistics              |                        |                        |
| $R_{\text{work}}^a$                | 0.161 (0.186)          |                        |
| $R_{\text{free}}$                  | 0.188 (0.221)          |                        |
| Average B-factor (Å <sup>2</sup> ) | 21.67                  |                        |
| Protein                            | 19.94                  |                        |
| Water                              | 31.35                  |                        |
| Ligands                            | 16.13                  |                        |
| R.m.s.d. from ideal geometry       |                        |                        |

|                       |       |
|-----------------------|-------|
| R.m.s.d. length (Å)   | 0.007 |
| R.m.s.d. angles (°)   | 0.76  |
| Ramachandran Plot (%) |       |
| Favored               | 97.64 |
| Allowed               | 2.36  |
| Outliers              | 0     |

Values in parentheses indicate the highest resolution bin

$$^a R_{\text{work}} = \frac{\sum_{hkl} ||F_{\text{obs}}| - |F_{\text{calc}}||}{\sum_{hkl} (F_{\text{obs}})}$$

### Supplementary Table 3 | SAXS parameters of VhaC.

#### Parameters

##### Data Collection

|                               |                               |
|-------------------------------|-------------------------------|
| Beam line                     | SSRF (Shanghai, China) BL19U2 |
| Wavelength (Å)                | 0.923                         |
| Detector                      | Pilatus 1M                    |
| $q$ range (Å <sup>-1</sup> )  | 0.009-0.45                    |
| Exposure time (s)             | 0.5 s for 20 frames           |
| Protein concentration (mg/ml) | 0.5 to 9 mg/mL                |
| Temperature (°C)              | 10                            |

##### Structural Parameters

|                                             |              |
|---------------------------------------------|--------------|
| $I(0)$ (cm <sup>-1</sup> ) from Guinier fit | 15.65 ± 0.06 |
| $R_g$ (Å) from Guinier fit                  | 42.58 ± 0.32 |

---

|                                        |                   |
|----------------------------------------|-------------------|
| $I(0)$ (cm <sup>-1</sup> ) from $P(r)$ | $15.77 \pm 0.06$  |
| $R_g$ (Å) from $P(r)$                  | $44.82 \pm 0.35$  |
| $D_{\max}$ (Å) from $P(r)$             | 176               |
| <b>Modeling</b>                        |                   |
| DAMMIN $\chi^2$                        | 1.185             |
| DAMMIN Ensemble Resolution             | $39 \pm 3$        |
| DAMMIN NSD                             | $0.634 \pm 0.055$ |
| <b>Software Employed</b>               |                   |
| Primary data Processing                | RAW               |
| $P(r)$                                 | GNOM              |
| <i>Ab initio</i> shape analysis        | DAMMIF            |
| Rigid body modeling                    | CORAL             |
| SAXS Profile computation               | CRYSOL            |
| Molecular Visualization                | PyMOL             |

---

**Supplementary Table 4 | Peptides released from type I collagen fibers by VhaC<sup>a</sup>.**

---

| <b>Region</b>  | <b>MH<sup>+</sup></b> | <b>PS</b> | <b>Peptide sequence</b> | <b>Cha</b>  | <b>Position</b> |
|----------------|-----------------------|-----------|-------------------------|-------------|-----------------|
|                | <b>[Da]</b>           | <b>Ms</b> |                         | <b>-in</b>  |                 |
| N-telo peptide | 1252.60               | 1         | Y.GYDEKSTGISVP.G        | $\alpha$ -1 | 166 - 177       |
| C-telo peptide | 862.39                | 2         | P.GPPSGGYDLS            | $\alpha$ -1 | 1189 - 1197     |
| C-telo peptide | 949.42                | 1         | P.GPPSGGYDLS.F          | $\alpha$ -1 | 1189 - 1198     |
| C-telo peptide | 1096.49               | 1         | P.GPPSGGYDLSF.L         | $\alpha$ -1 | 1189 - 1199     |

---

|                |         |    |                                                |             |             |
|----------------|---------|----|------------------------------------------------|-------------|-------------|
| C-teloepptide  | 1434.69 | 1  | P.GPPSGGYDLSFLPQ.P                             | $\alpha$ -1 | 1189 - 1202 |
| C-teloepptide  | 1756.85 | 7  | P.GPPSGGYDLSFLPQPPQ.E                          | $\alpha$ -1 | 1189 - 1205 |
| C-teloepptide  | 1885.89 | 4  | P.GPPSGGYDLSFLPQPPQ.E.K                        | $\alpha$ -1 | 1189 - 1206 |
| C-teloepptide  | 2222.08 | 1  | P.GPPSGGYDLSFLPQPPQEK.AH.D                     | $\alpha$ -1 | 1189 - 1209 |
| C-teloepptide  | 2337.12 | 1  | P.GPPSGGYDLSFLPQPPQEK.AH.D.G                   | $\alpha$ -1 | 1189 - 1210 |
| C-teloepptide  | 2394.14 | 2  | P.GPPSGGYDLSFLPQPPQEK.AH.D.G.G                 | $\alpha$ -1 | 1189 - 1211 |
| C-teloepptide  | 2607.25 | 7  | P.GPPSGGYDLSFLPQPPQEK.AH.D.G.G.R.Y             | $\alpha$ -1 | 1189 - 1213 |
| C-teloepptide  | 2933.40 | 32 | P.GPPSGGYDLSFLPQPPQEK.AH.D.G.G.R.Y.Y.R         | $\alpha$ -1 | 1189 - 1215 |
| C-teloepptide  | 3160.52 | 5  | P.GPPSGGYDLSFLPQPPQEK.AH.D.G.G.R.Y.Y.R.A.D     | $\alpha$ -1 | 1189 - 1217 |
| C-teloepptide  | 3390.54 | 1  | P.GPPSGGYDLSFLPQPPQEK.AH.D.G.G.R.Y.Y.R.A.D.D.A | $\alpha$ -1 | 1189 - 1219 |
| C-teloepptide  | 2682.26 | 5  | P.SGGYDLSFLPQPPQEK.AH.D.G.G.R.Y.Y.R            | $\alpha$ -1 | 1192 - 1215 |
| C-teloepptide  | 1290.63 | 1  | S.GGYDLSFLPQPP.Q                               | $\alpha$ -1 | 1193 - 1204 |
| C-teloepptide  | 1418.69 | 1  | S.GGYDLSFLPQPPQ.E                              | $\alpha$ -1 | 1193 - 1205 |
| C-teloepptide  | 2595.20 | 3  | S.GGYDLSFLPQPPQEK.AH.D.G.G.R.Y.Y.R             | $\alpha$ -1 | 1193 - 1215 |
| C-teloepptide  | 2822.36 | 1  | S.GGYDLSFLPQPPQEK.AH.D.G.G.R.Y.Y.R.A.D         | $\alpha$ -1 | 1193 - 1217 |
| C-teloepptide  | 2002.98 | 1  | S.FLPQPPQEK.AH.D.G.G.R.Y.Y.R                   | $\alpha$ -1 | 1199 - 1215 |
| triple-helical | 1144.52 | 1  | P.GKNGDDGEAGK.P.G                              | $\alpha$ -1 | 226 - 237   |
| triple-helical | 1201.60 | 1  | K.GHRGFSGLDGAK.G                               | $\alpha$ -1 | 265 - 276   |
| triple-helical | 1094.51 | 2  | R.GFSGLDGAKGDA.G                               | $\alpha$ -1 | 268 - 279   |
| triple-helical | 851.42  | 1  | R.GFSGLDGAK.G                                  | $\alpha$ -1 | 268 - 276   |
| triple-helical | 1057.48 | 1  | V.GPAGKDGEAGA.Q.G                              | $\alpha$ -1 | 607 - 618   |
| triple-helical | 826.45  | 1  | G.PQGIAGQR.G                                   | $\alpha$ -1 | 950 - 957   |

---

---

|                |         |    |                              |             |             |
|----------------|---------|----|------------------------------|-------------|-------------|
| triple-helical | 1248.54 | 1  | R.GDKGETGEQGDR.G             | $\alpha$ -1 | 1093 - 1104 |
| triple-helical | 1546.74 | 1  | R.GDKGETGEQDGRGIK.G          | $\alpha$ -1 | 1093 - 1107 |
| triple-helical | 1896.92 | 2  | R.GDKGETGEQDGRGIKGHR.G       | $\alpha$ -1 | 1093 - 1110 |
| triple-helical | 2188.04 | 2  | R.GDKGETGEQDGRGIKGHRGFS.G    | $\alpha$ -1 | 1093 - 1113 |
| triple-helical | 2486.20 | 1  | R.GDKGETGEQDGRGIKGHRGFSGLQ.G | $\alpha$ -1 | 1093 - 1116 |
| triple-helical | 801.38  | 1  | R.GRTGDAGPA.G                | $\alpha$ -1 | 1168 - 1176 |
| C-telopeptide  | 1189.48 | 1  | P.GPSGGGYEFGFD.G             | $\alpha$ -2 | 1100 - 1111 |
| C-telopeptide  | 1508.60 | 1  | P.GPSGGGYEFGFDGDF.Y          | $\alpha$ -2 | 1100 - 1114 |
| C-telopeptide  | 1671.67 | 33 | P.GPSGGGYEFGFDGDFY.R         | $\alpha$ -2 | 1100 - 1115 |
| C-telopeptide  | 1827.76 | 28 | P.GPSGGGYEFGFDGDFYR.A        | $\alpha$ -2 | 1100 - 1116 |
| C-telopeptide  | 1898.80 | 53 | P.GPSGGGYEFGFDGDFYRA.D       | $\alpha$ -2 | 1100 - 1117 |
| C-telopeptide  | 1517.58 | 1  | P.SGGGYEFGFDGDFY.R           | $\alpha$ -2 | 1102 - 1115 |
| C-telopeptide  | 1673.68 | 2  | P.SGGGYEFGFDGDFYR.A          | $\alpha$ -2 | 1102 - 1116 |
| C-telopeptide  | 1744.72 | 2  | P.SGGGYEFGFDGDFYRA.D         | $\alpha$ -2 | 1102 - 1117 |
| C-telopeptide  | 1267.49 | 2  | S.GGGYEFGFDGDF.Y             | $\alpha$ -2 | 1103 - 1114 |
| C-telopeptide  | 1430.55 | 26 | S.GGGYEFGFDGDFY.R            | $\alpha$ -2 | 1103 - 1115 |
| C-telopeptide  | 1586.65 | 39 | S.GGGYEFGFDGDFYR.A           | $\alpha$ -2 | 1103 - 1116 |
| C-telopeptide  | 1657.69 | 35 | S.GGGYEFGFDGDFYRA.D          | $\alpha$ -2 | 1103 - 1117 |
| C-telopeptide  | 1373.53 | 2  | G.GGYEFGFDGDFY.R             | $\alpha$ -2 | 1104 - 1115 |
| C-telopeptide  | 1529.64 | 3  | G.GGYEFGFDGDFYR.A            | $\alpha$ -2 | 1104 - 1116 |
| C-telopeptide  | 1600.67 | 2  | G.GGYEFGFDGDFYRA.D           | $\alpha$ -2 | 1104 - 1117 |
| C-telopeptide  | 1316.51 | 2  | G.GYEFGFDGDFY.R              | $\alpha$ -2 | 1105 - 1115 |

---



---

|                |         |   |                     |             |             |
|----------------|---------|---|---------------------|-------------|-------------|
| C-telopeptide  | 1472.61 | 1 | G.GYEFGFDGDFYR.A    | $\alpha$ -2 | 1105 - 1116 |
| C-telopeptide  | 1543.65 | 3 | G.GYEFGFDGDFYRA.D   | $\alpha$ -2 | 1105 - 1117 |
| C-telopeptide  | 1194.52 | 1 | E.FGFDGDFYRA.D      | $\alpha$ -2 | 1108 - 1117 |
| C-telopeptide  | 919.39  | 1 | G.FDGDFYR.A         | $\alpha$ -2 | 1110 - 1116 |
| C-telopeptide  | 990.43  | 2 | G.FDGDFYRA.D        | $\alpha$ -2 | 1110 - 1117 |
| triple-helical | 1108.58 | 1 | K.GIRGHNGLDGL.K     | $\alpha$ -2 | 176 - 186   |
| triple-helical | 1236.68 | 1 | K.GIRGHNGLDGLK.G    | $\alpha$ -2 | 176 - 187   |
| triple-helical | 1444.70 | 1 | S.GEEGKRGSTGEIGPA.G | $\alpha$ -2 | 374 - 388   |
| triple-helical | 1188.63 | 2 | P.GGKGEKGETGLR.G    | $\alpha$ -2 | 650 - 661   |
| triple-helical | 846.37  | 1 | A.GANGDRGEA.G       | $\alpha$ -2 | 686 - 694   |
| triple-helical | 1071.48 | 1 | A.GANGDRGEAGPA.G    | $\alpha$ -2 | 686 - 697   |
| triple-helical | 891.40  | 1 | P.GLAGHHGDQ.G       | $\alpha$ -2 | 1031 - 1039 |

---

<sup>a</sup>Nano LC-MS was used to separate the peptides released from type I collagen fibers and to determine their molecular masses. The sequence of the released peptides was analyzed by Sequest HT search tool. Source data are provided as a Source Data file.
